# Supplementary material for: An engineered bacterium auxotrophic for an unnatural amino acid: a novel biological containment system
Source: PeerJ. 2015 Sep 15;3:e1247. doi: 10.7717/peerj.1247 (PMC4579030; doi:10.7717/peerj.1247)
Supplement: Data S1 [file peerj-03-1247-s006.xlsx]

## Sheet: Sheet1
	Data set for Figure 2B
	Time-killing curve
	Yusuke Kato
		trial 1	trial 2	trial 3	trial 4	trial 1	trial 2	trial 3	trial 4
	Time (h)	cfu	cfu	cfu	cfu	relative cfu	relative cfu	relative cfu	relative cfu	mean rcfu	se
	0	140	73	115	208	1	1	1	1	1	0
	1	1072	468	834	1307	7.66	6.41	7.25	6.28	6.9	0.33
	2	798	200	474	1122	5.7	2.74	4.12	5.39	4.49	0.68
	3	219	169	216	253	1.56	2.32	1.88	1.22	1.75	0.23
	4	209	35	112	155	1.49	0.48	0.97	0.75	0.92	0.21
	5	84	12	44	128	0.6	0.16	0.38	0.62	0.44	0.11
	6	6	11	23	12	0.04	0.15	0.2	0.06	0.11	0.04
	7	6	11	3	15	0.04	0.15	0.03	0.07	0.07	0.03
