# Supplementary material for: An engineered bacterium auxotrophic for an unnatural amino acid: a novel biological containment system
Source: PeerJ. 2015 Sep 15;3:e1247. doi: 10.7717/peerj.1247 (PMC4579030; doi:10.7717/peerj.1247)
Supplement: Data S3 [file peerj-03-1247-s008.xlsx]

## Sheet: Sheet1
	Data set for fluctuation assay
	Yusuke Kato
	plate no	cal total escaper	cal total cfu (´ 103)
	1	52	1924
	2	188	2276
	3	160	3392
	4	136	2136
	5	128	2212
	6	192	2516
	7	164	1964
	8	144	1472
	9	176	2764
