# Supplementary material for: An engineered bacterium auxotrophic for an unnatural amino acid: a novel biological containment system
Source: PeerJ. 2015 Sep 15;3:e1247. doi: 10.7717/peerj.1247 (PMC4579030; doi:10.7717/peerj.1247)
Supplement: Data S4 [file peerj-03-1247-s009.xlsx]

## Sheet: Sheet1
	Data set
	Effect of longer incubation
	Yusuke Kato
		trial 1	trial 2	trial 3
	Time (h)	cfu	cfu	cfu
	30	12	63	29
	54	12	63	30
	78	12	63	30
	102	12	63	30
	total innoculation	2011´103	nd	nd
	nd: no data
